# Supplementary material for: A robust cell culture system for large scale feeder cell-free expansion of human breast epithelial progenitors
Source: PubMed Central journal article supplement (PMC6172804; doi:10.1186/s13287-018-0994-y), 2018-10-04

Figure S1

A.

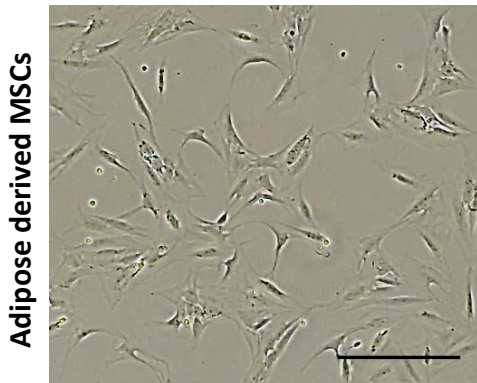

B.

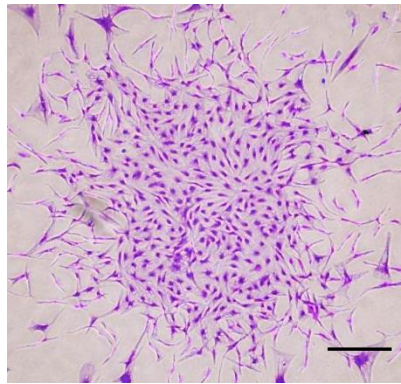

C.

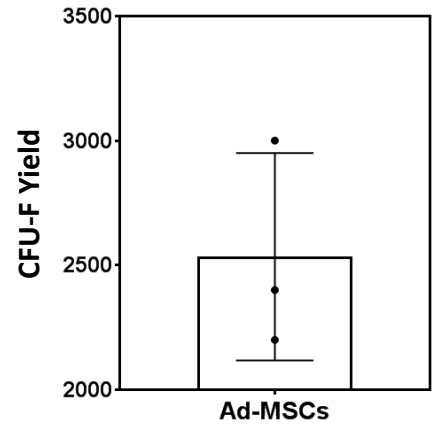

D.

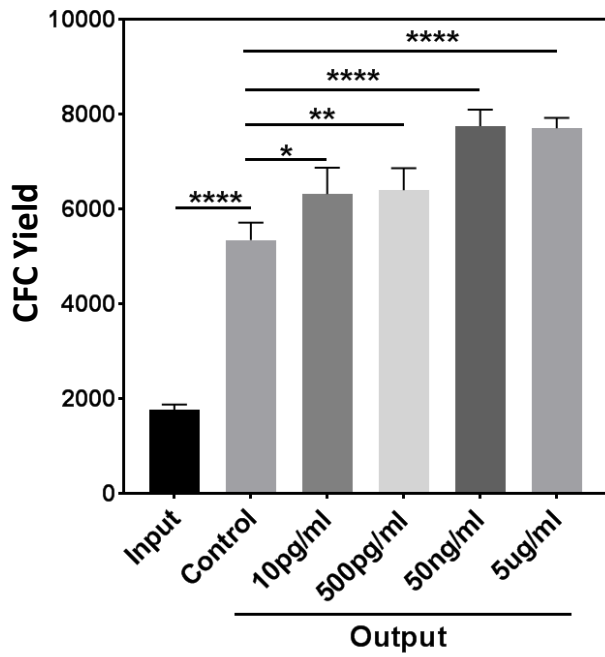

E.

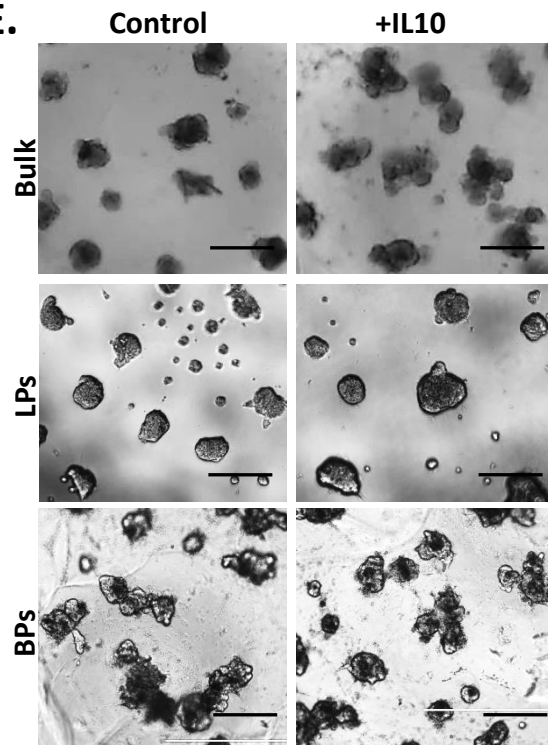

F.

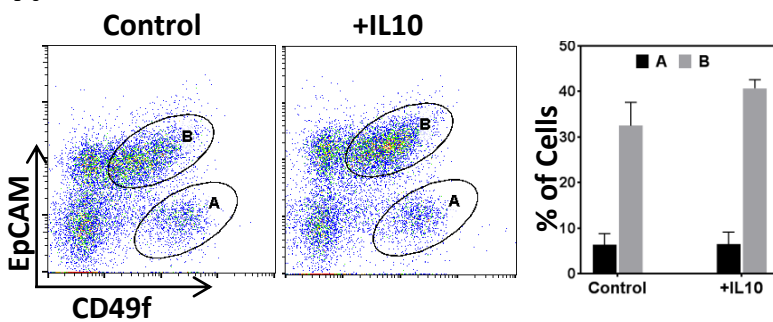

G.

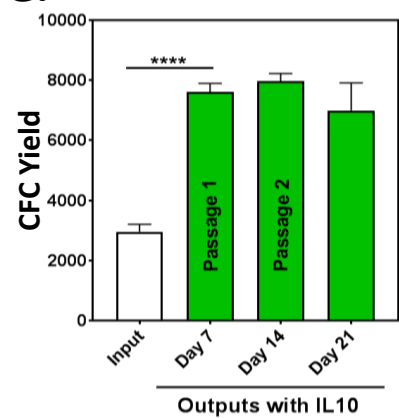

Figure S2

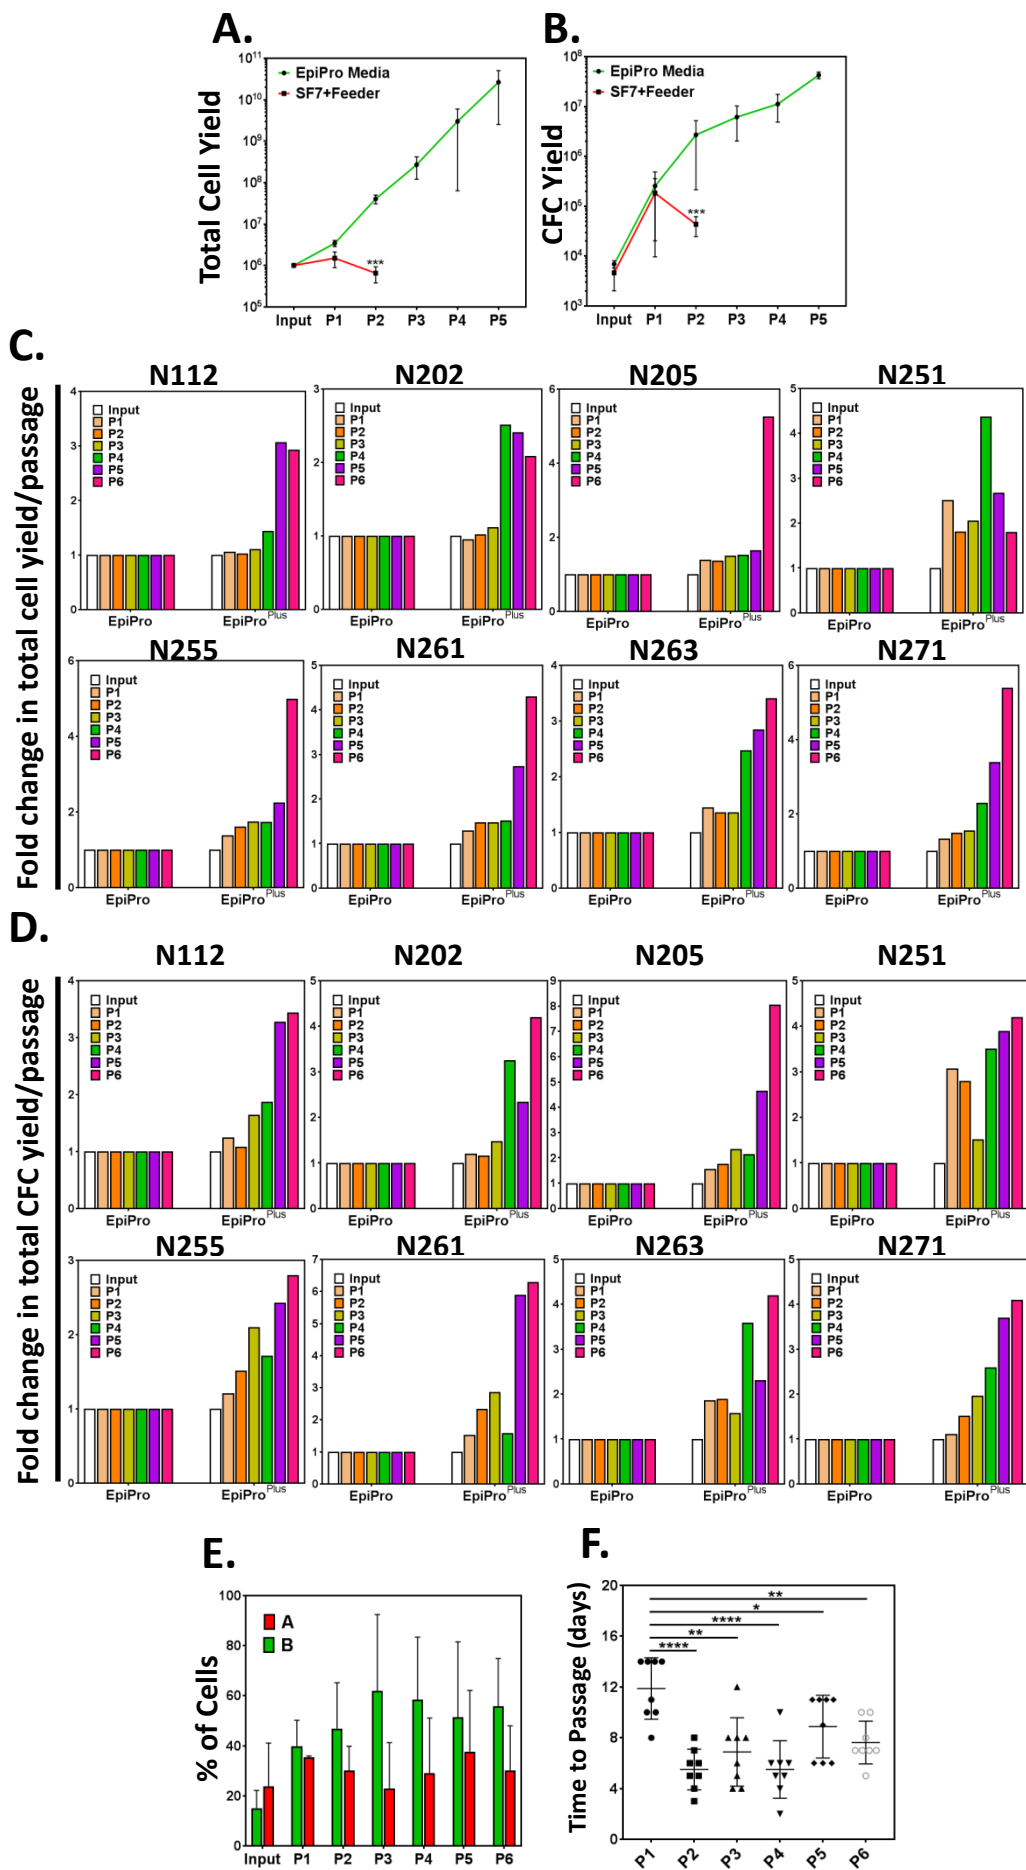

Supplement: 13287_2018_994_MOESM1_ESM.pdf [file 13287_2018_994_MOESM1_ESM.pdf]
