# Supplementary material for: A robust cell culture system for large scale feeder cell-free expansion of human breast epithelial progenitors
Source: PubMed Central journal article supplement (PMC6172804; doi:10.1186/s13287-018-0994-y), 2018-10-04
Supplement: 13287_2018_994_MOESM4_ESM.pdf [file 13287_2018_994_MOESM4_ESM.pdf]

## ***Supplementary Methods***

### *Adipose-derived mesenchymal stem cell isolation*

The stromal vascular fraction (SVF) isolated from abdominal fat tissue was used as source of adipose-derived mesenchymal stem cell (AdMSCs) [1]. Adipose tissue was minced and digested and made into single-cell suspension and treated with red blood cell lysis buffer (Sigma-Aldrich) and cryogenically preserved. For experiments requiring AdMSCs, the SVF cells were thawed and passaged *in vitro* at least twice, as described before to obtain a homogeneous population of AdMSCs.

### *Immunofluorescent staining*

Immunofluorescence staining was performed on the epithelial colonies grown in 2D. Briefly, colonies grown in 6-well culture dishes were fixed in 1:1 vol/vol acetone and methanol solution and pre-blocked in Tris-buffered saline containing 5% wt/vol BSA. Subsequently, plates were stained with unconjugated mouse monoclonal antibody raised against human Cytokeratin 8/18 (Abcam) and rabbit monoclonal antibody raised against human cytokeratin 14 (Abcam). Protein expression was visualized using anti-mouse PE- and anti-rabbit Alexa 488-conjugated secondary antibodies and the cell nuclei visualized by DAPI staining. For immunofluorescence staining of cytopun and air-dried cells on glass slides, cells were permeabilized using ice cold methanol followed by blocking in Tris-buffered saline containing 5% wt/vol BSA. Slides were then incubated with unconjugated rabbit monoclonal antibody raised against human Estrogen Receptor alpha (ER $\alpha$ , SantaCruz Biotechnology) for 1hr at room temperature and protein expression was obtained using anti-rabbit Cy3-conjugated secondary antibody and the nuclei visualized by DAPI staining.

### *Quantitative real-time PCR*

Total RNA was extracted from fresh or cultured cells using the Trizol reagent (Invitrogen) and cDNA was prepared from 1  $\mu$ g of RNA using the Maxima cDNA synthesis kit (Thermo Fisher) and was used as a template for quantitative real time PCR (CFX Connect 96, Bio-Rad). Transcript expression of specific genes was obtained using gene-specific primers and relative expression level of each transcript was normalized to the *HPRT* transcript level.

### *Statistical Analysis*

The ANOVA and student T-tests were performed using the GraphPad Prism 7.02 program (San Diego, CA).

### *Supplementary References*

1. Chatterjee S, Laliberte M, Blelloch S, Ratanshi I, Safneck J, Buchel E, Raouf A:  
**Adipose-Derived Stromal Vascular Fraction Differentially Expands Breast Progenitors in Tissue Adjacent to Tumors Compared to Healthy Breast Tissue.**  
*Plastic and reconstructive surgery* 2015, **136**(4):414e-425e.
